# Supplementary material for: Design and structural validation of peptide–drug conjugate ligands of the kappa-opioid receptor
Source: PubMed Central journal article supplement (PMC10698194; doi:10.1038/s41467-023-43718-w), 2023-12-06
Supplement: 41467_2023_43718_MOESM3_ESM.pdf [file 41467_2023_43718_MOESM3_ESM.pdf]

**File Name: Supplementary Data 1**

**Description:** Backbone generation protocol, <thioether\_backbone.py>

**File Name: Supplementary Data 2**

**Description:** Backbone to anchor docking protocol, <docking\_protocol.py>

**File Name: Supplementary Data 3**

**Description:** Side chain rotamer design and filtering protocol, <kappa\_peptide\_design.xml>

**File Name: Supplementary Data 4**

**Description:** Residue and parameter files for scripts supplied in Supplementary Data 1 - 3, i.e. <CYY.params>, <CVV.params>, <l\_res.txt>, <d\_res.txt>
